# Supplementary material
Source: publisher figshare collection journal article supplement (https://gsajournals.figshare.com/ndownloader/files/23536508)
Supplement: Supplementary file 1 [file 23536508]

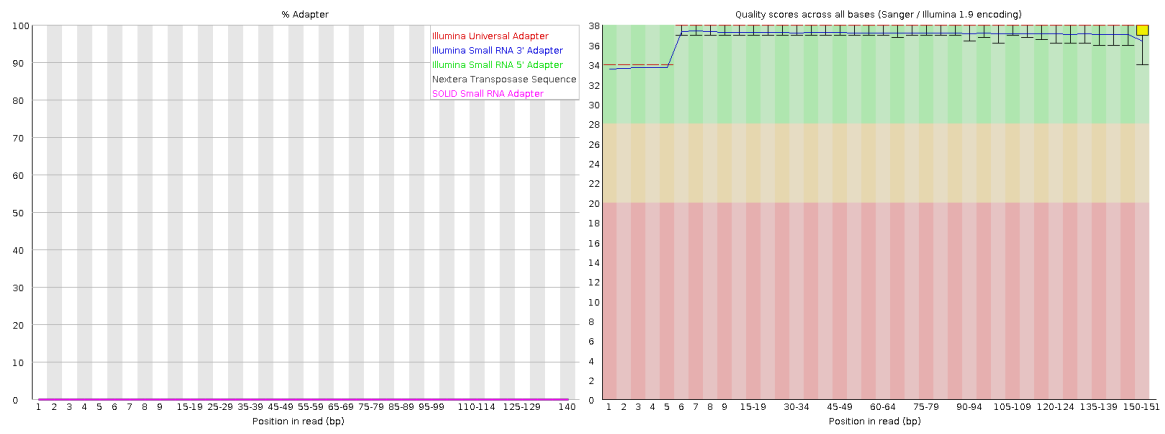

**Figure S1:** Quality control checks of the raw read data using FastQC. No adapters were present (left) and base quality scores were  $>30$ , equivalent to an error rate of  $<0.1\%$  (right).
